1 **Title:**

2 How to reach a higher selection plateau with optimal contribution selection and compensatory  
3 mating?

4

5 **Short title:**

6 Optimal contribution selection and compensatory mating.

7

8 **Authors:**

9 Tiret Mathieu<sup>1,2\*</sup>, Pégard Marie<sup>1,3</sup>, Sánchez Leopoldo<sup>1</sup>

11

12 1. BioForA, INRAE, ONF, F-45075 Orléans, France.

13

14 2. Department of Ecology and Genetics, Evolutionary Biology Centre, Uppsala University, Uppsala,  
15 Sweden.

16

17 3. Univ. Bordeaux, INRAE, BIOGECO, F-33610, Cestas, France

18

19 \* : Corresponding author: [mathieu.tiret@ebc.uu.se](mailto:mathieu.tiret@ebc.uu.se).

## 20 Abstract

21 In breeding programs, balancing short-term genetic gain and loss of diversity per generation is  
22 essential to sustain a long-term genetic response. Depending on the dynamic of the species, the  
23 acceptable trade-off will be different. One of the most common and successful tools to achieve this  
24 management is the Optimal Contribution Selection (OCS), which readily mathematically formulate  
25 the trade-off between genetic gain and coancestry. However, OCS only accounts for the next  
26 generation gain and diversity, which can lead to suboptimality given the uncertainties of random  
27 mating and segregation. In this paper, we have extended the OCS by conveniently integrating a  
28 way to promote certain parental pairs, so that this method can account for the next t+2 generation.  
29 In the study case of *Populus nigra*, fully phenotyped and SNP array genotyped, we have shown  
30 that (i) a non negligible part of the long-term success of a breeding strategy depends on the  
31 implemented mating strategy, and (ii) favoring a compensatory mating can accelerate the selection  
32 without compromising the future diversity.

33  
34 keywords : genomic selection, quantitative genetics, mating selection, simulation.

## 35 Introduction

36 Genomic selection (Meuwissen *et al.*, 2001), in spite of using more precise Mendelian sampling  
37 terms compared to pedigree-based selection, and drastically increasing genetic response doing so,  
38 it also accelerates the loss of genetic diversity per unit of time (Goddard, 2009; Hayes *et al.*, 2009;  
39 Rutkoski *et al.*, 2015). Yet, over the past decades, a growing number of authors have emphasized  
40 the importance of balancing loss of diversity and short-term genetic gain to sustain a long-term  
41 genetic response (Brisbane & Gibson, 1995; Woolliams *et al.*, 2002; Jannink, 2010). This is  
42 especially true for perennial trees, for which minimal husbandry is provided while they can face  
43 harsh environments over a long period.

44

45 Optimal contribution selection (or OCS) was introduced by Meuwissen (1997) as a complement to  
46 the widely used Best Linear Unbiased Predictor (BLUP). BLUP conveniently integrated family  
47 information for increased accuracy but also led to rapid co-selection of relatives. OCS maximizes  
48 the genetic gain while maintaining the inbreeding rate to a predefined level. It was originally  
49 formulated with the pedigree-based relationship matrix (A), but nowadays it can be easily adapted  
50 to the genomic relationship matrix (G). Its simplicity has made it today one of the most successful  
51 strategies to address the problem of selection-induced loss of diversity (Meuwissen *et al.*, 2020).  
52 Furthermore, its flexibility has facilitated countless extensions. As a non-exhaustive illustration of its  
53 potential, De Beukelaer (2017) extended OCS for different measures, such as heterozygosity, or  
54 the criterion of Li *et al.* (2008); Gebregiwergis *et al.* (2020) incorporated an alternative formulation  
55 of the genomic relationship matrix via QTL and markers; and some authors even attempted to  
56 combine it with mating (Varona & Misztal, 1999; Toro & Varona, 2010; Vitezica *et al.*, 2013;  
57 Akdemir & Sánchez, 2016).

58

59 Mating selection also addresses the long-term dynamics, but on a different timescale than OCS, by  
60 controlling homozygosity in the next generation, or equivalently inbreeding at generation  $t+2$ .  
61 Softening selection on this expanded timescale is of particular interest in breeding in order to  
62 reduce the so-called and undesired Bulmer effect (Bulmer, 1971). Therefore, by their different  
63 timescales, OCS and mating selection, although incompatible in their formulations, might be  
64 complementary (Akdemir & Sánchez, 2016; Yoshida *et al.*, 2020). Some sort of mating selection  
65 could be useful for perennials where production plantings consist of elite clones resulting from  
66 selected crosses. We have therefore attempted to combine OCS and mating selection with an  
67 alternative formulation of the genomic relationship matrix. However, planning mating strategies  
68 raises some operational issues, and we need simple solutions that impose mating without the  
69 operational constraints.

70

71 The twofold challenge of this article, as an extension of the classic OCS, is to (1) devise a way to  
72 make OCS promote the likelihood of useful matings, while (2) avoiding the need to explicitly  
73 optimize the mating allocation. To do so, following the approach of Gebregiwergis *et al.* (2020), we  
74 explored alternative ways of constructing the genomic relationship matrices to help OCS account  
75 for coancestry at the t+2 or higher generation. We believe that studying these questions, and  
76 finding a way to incorporate mating into OCS could lead to a methodology that allows for higher  
77 selection plateaus (Jannink, 2010) in a long term breeding program. First, we have developed a  
78 deterministic algorithm that can solve both classic OCS and any of its extensions. We have then  
79 applied our method to the case study of selection in a population of *Populus nigra* L. (Salicaceae),  
80 to show by simulations that a multi-generation breeding program can achieve higher performances  
81 than with a classic OCS, for a certain range of parameters. Finally, we have shown that, among all  
82 the possible ways of constructing the genomic relationship matrix, the best overall strategy in our  
83 comparison is to favor mating similar to the so-called compensatory mating (Santiago & Caballero,  
84 1995; Sánchez *et al.*, 2006).

## 85 Methods

### 86 Optimal contribution selection

87 Genetic contributions are the cornerstone of OCS. The two opposing items in the optimization of  
88 selection in OCS, gain and diversity, can be formulated according to the same decision variable,  
89 genetic contribution. The genetic contribution can be defined as the proportion of genes from a  
90 given ancestor that are present in a given cohort of descendants. More generally, the genetic  
91 contribution of an individual is its proportional contribution to the gene pool of the descendant  
92 population (Woolliams & Mäntysaari, 1995). In our case, when considering non-overlapping  
93 generations, the genetic contribution of a given parent would simply be its proportional contribution  
94 to the offspring of the next generation. We denote  $\mathbf{c}$  the vector of  $N$  genetic contributions, with  $N$   
95 being the size of the parental population. Defined as such,  $\sum c_i = 1$ .

96

97 With the knowledge of  $Y$  the vector of parental breeding values and  $A$  the numerator relationship  
98 matrix between parents (or  $G$  the realized genomic relationship matrix), it is possible to formulate  
99 the expected future performance or inbreeding coefficient of the population as  $c^T Y$  ( $cY$  for  
100 simplicity) or as  $\frac{1}{2} c^T A c$  respectively (or  $c^T G c$  when using the genomic relationship matrix;  $cA c$  and  
101  $cG c$  for simplicity). Deriving optimal selection decisions simultaneously accounting for future  
102 performance and future inbreeding is then possible through OCS, using genetic contributions as a  
103 decision variable. One of the simplest formulations of such a problem is to solve  $\min. cY - \lambda cG c$   
104 (see Woolliams *et al.*, 2002 and references therein). It is important to note that the weighted  
105 average of  $c^T A c$  (or  $c^T G c$ ) represents the expected inbreeding assuming *panmixia* or, more  
106 precisely, uniting in a full diallelic way all parents while respecting each parental  $c$ . This  
107 corresponds to the best expectation for inbreeding when the mating regime is unknown or not  
108 under the control of the breeder, which is often the case when, for example, matings are allowed to  
109 follow an open pollination regime as in a seed orchard.

110

111 As can be demonstrated,  $cG c$  is proportional to  $\| f - 0.5 \|$ , where  $f$  is the vector of allelic  
112 frequencies in the next generation, and  $\| \cdot \|$  the  $l_2$ -norm. Therefore, minimizing  $cG c$  makes the  
113 resulting frequencies tend toward 0.5, which is the furthest point from fixation. As selection over  
114 cycles tends to accelerate the change of frequencies when they are intermediate, i.e. when the  
115 variances are at the highest levels, the risks of loss of favorable alleles by hitchhiking the  
116 alternative detrimental would also increase (Sánchez *et al.*, 2006). By maintaining frequencies at  
117 intermediate levels, OCS would reduce this risk with potentially a slower fixation of favorable  
118 alleles, but overall benefits over the long-term genetic gain.

### 119 OCS and convex optimisation

120 Originally, Meuwissen *et al.* (2001) formulated OCS as the maximization of genetic gain ( $cY$ )  
121 subject to a constrained inbreeding coefficient ( $cA c$ ). Likewise, it is also possible to minimize the  
122 inbreeding rate while constraining the genetic gain (Akdemir & Sánchez, 2016). Choosing the  
123 adequate constraint is critical for populations never confronted to OCS. The methodology was

124 primarily devised with long-term domesticated populations in mind, where records of change in  
125 inbreeding and genetic gain are typically known over several cycles, facilitating the choice of  
126 constraints. In the absence of historical references, for novel species, a gradient of constraints  
127 would need to be evaluated *a priori*. In this sense, a holistic approach allowing visualization of the  
128 optimized function over a wide range of scenarios would be preferable as a start.

129

130 Following the approach of Akdemir *et al.* (2019), we considered OCS as a multi-objective  
131 optimization, where gain and diversity are improved simultaneously, i.e. maximizing gain and  
132 minimizing coancestry, by pondering weights that set the balance between the two items. The  
133 solutions of a multi-objective optimization, called Pareto optima (Figure S1), delineate a two-  
134 dimensional curve.

135

136 Optimizing in two dimensions (genetic gain and coancestry) does not have the same meaning as  
137 optimizing in one dimension with constraints. Mathematically, multi-objective optimization (or  
138 minimize  $(cGc, -cY)$ ) is equivalent to the scalarized version of the problem: minimize  $\lambda cGc - cY$  for  
139 any  $\lambda > 0$ . The scalarized problem has a unique global solution since the objective function is  
140 strictly convex ( $G$  is positive definite, as shown below). In other words, the curve of Pareto optima  
141 is the parametric curve, as a function of  $\lambda$ , of solutions minimizing  $\lambda cGc - cY$ . It is therefore the set  
142 of  $(c^*Gc^*, c^*Y)$ , where  $c^*$  is the optimal contribution vector for a given  $\lambda$ . Without loss of generality,  
143 we consider the scalarized problem parameterized by  $\alpha$  such that the problem becomes:

144

$$145 \quad \min. \alpha cGc - (1 - \alpha) cY \quad (1)$$

146

147 where  $\alpha \in [0;1]$  can be interpreted as the tradeoff value between coancestry and genetic gain (or  
148 the weight of coancestry compared to that of genetic gain).

149

150 Each OCS solution given a constraint (as in Meuwissen *et al.*, 2001) is a particular Pareto  
151 optimum, or, in other words, is the solution of the scalarized problem for a particular  $\alpha$  (if the  
152 constraint is not ill-formulated, i.e. not out of range). Choosing a value for  $\alpha$  is as arbitrary as  
153 choosing a value for a constraint when there is no *a priori*, but at least the range of  $\alpha$  is known, and  
154 its interpretation is biologically intuitive :  $\alpha$  is the quantification of the tradeoff between genetic gain  
155 and diversity. Different selection scenarios can then be compared by varying a single parameter.

156

157 We have furthermore added some operational constraints to the multi-objective problem: the  
158 contributions must be larger than 0 to have a biological meaning but smaller than 0.5 to avoid  
159 selfing ( $0 \leq c \leq 0.5$ ), and the sum of all contributions must be equal to 1 ( $\mathbf{1}^T \cdot c = 1$ ). The constrained  
160 scalarized problem for a particular value of  $\alpha$  is a constrained quadratic programming and can  
161 therefore be solved deterministically with an interior point method, adequate to solve constrained  
162 convex optimization (Boyd *et al.*, 2004). The algorithm used here (coded in R – version 3.6.3) is  
163 available on github ([https://github.com/mathieutiret/ocs\\_solve.git](https://github.com/mathieutiret/ocs_solve.git)).

164 Different genomic matrices

165 Let  $X$  be the matrix describing the genotypes of the population, with  $L$  rows (number of markers)  
166 and  $N$  columns (number of individuals). The two homozygous states are encoded as  $-1$  and  $1$ , and  
167 the heterozygous state as  $0$  (as in VanRaden, 2008). The realized genomic relationship matrix is  
168 then formulated as  $G = X^T X$  ( $N \times N$  matrix). Note that the elements of  $X$  are not corrected by minor  
169 allele frequencies, nor should the resulting  $G$  be scaled by the expected heterozygosity, as is  
170 usually done for genomic estimation. Therefore, the diagonal elements of  $G$  provide information on  
171 the number of homozygous loci per individual, while the off-diagonal elements reflect the number  
172 of homozygous states shared by individuals across loci. Thus, for off-diagonals, the same  
173 homozygous state at a given locus adds one unit to the count, while one unit is subtracted for  
174 opposite homozygous states (not accounting for heterozygote by heterozygote, pointed out by Gao  
175 & Martin, 2009), producing overall large values for pairs with resembling parents and small values

176 for pairs with genetically distinct parents. For illustration, the matrix multiplication for one locus was  
177 summarized in Table S1.

178

179 We can see  $G$  as a penalty matrix when used to minimize the future population coancestry (or  
180  $cGc$ ). Some parental combinations will be penalized, such as the pairs comprising parents with the  
181 same homozygous state (1 in Table S1). Likewise, some pairs will be promoted, such as those with  
182 distinct homozygous states (-1 in Table S1), as they will produce heterozygous offspring. It is  
183 possible to generalize how different pairs contribute differentially to future diversity, as summarized  
184 in Table 1. In this generalization,  $\beta$  and  $\gamma$  range from -1 to 1, respectively weighting heterozygous x  
185 heterozygous ( $H_e \times H_o$ ) pairs, or heterozygous x heterozygous ( $H_e \times H_e$ ) pairs.  $H_e \times H_o$  pairs  
186 were called compensatory matings in previous studies when involving a selected QTL (Caballero  
187 *et al.*, 1996; Sánchez *et al.*, 2006). A high value of  $\gamma$  penalizes pairs of heterozygous candidates  
188 such that they would not be promoted among the selected parents and their likelihood of mating be  
189 consequently reduced. Playing with  $\gamma$  and  $\beta$  makes it possible to influence the mating strategy by  
190 pondering different states among the contributing parents according to their future impact on  
191 diversity. Hereafter, we denote  $G^*$  the matrix constructed according to Table 1, with  $G^* = G + \beta Q +$   
192  $\gamma W$ ,  $Q$  being the matrix accounting for heterozygous x homozygous loci and  $W$  accounting for  
193 heterozygous x heterozygous loci, as  $G$  account for homozygote loci (details in Supplementary  
194 materials).

195

196 **Table 1.** Generalization of the genomic relationship matrix for one locus, with parameters  $\beta$  and  $\gamma$ ,  
197 both ranging from -1 to 1, weighting respectively heterozygous x homozygous pairs, or  
198 heterozygous x heterozygous pairs.

199

|         |     |         |     |
|---------|-----|---------|-----|
| parents | - 1 | 0       | 1   |
| - 1     | 1   | $\beta$ | - 1 |



|   |         |          |         |
|---|---------|----------|---------|
| 0 | $\beta$ | $\gamma$ | $\beta$ |
| 1 | $-1$    | $\beta$  | 1       |

200

201

202 One might notice that, for one single locus, He x He pairs are different from He x Ho in terms of  
 203 resulting diversity at the generation t+2. G does not distinguish between these matings, although  
 204 G\* could. An alternative construction to correct this drawback would involve weightings resulting in  
 205 relatedness among the offspring equal to the Jacquard distance, which would correspond to  $\beta =$   
 206  $0.25$  and  $\gamma = 0$  in G\*. The allele sharing distance of Gao & Martin (2009) offers another alternative  
 207 construction for G\*.

208

209 In addition, we can derive that (details in Supplementary materials) :

$$210 \quad c^T G^* c = c^T G c + \beta c^T Q c + \gamma c^T W c = c^T G c + \beta 2He^T Ho + \gamma He^T He, \quad (2)$$

211

212 where He is the vector (of size L) of the proportion of heterozygous individuals contributing to the  
 213 next generation for each locus, and Ho the equivalent for homozygous individuals. We can see  
 214 from this equation that controlling  $\beta$  and  $\gamma$  allows us to change the frequency of the carriers of  
 215 favorable genotypic states, which in turn would favor the occurrence of certain crosses increasing  
 216 the segregation of diversity, for instance by promoting double heterozygous pairs over  
 217 homozygous x heterozygous pairs. Such extra segregation could intuitively allow for a more  
 218 sustainable genetic progress over the long term, without the risk of hitchhiking. It is important to  
 219 note that using alternative G\* in OCS is not intended as a mating selection *per se* since OCS  
 220 focuses on contributions per individual, but rather as a strategy for managing sustained  
 221 heterozygosity.

222

223 For the objective function to be strictly convex,  $G^*$  must be positive definite. Therefore, we  
224 performed a spectral projection of  $G^*$  on the set of positive definite matrices, ensuring that the  
225 projected matrix is the closest positive definite matrix to  $G^*$  (according to the spectral norm; Boyd  
226 *et al.*, 2004). We will from here onward denote the projection of  $G^*$  as  $G^*$  itself to ease the reading.

227

228 Other approaches to handle mating such as Minimum Coancestry Mating (Sonesson &  
229 Meuwissen, 2000) were proposed, but additional steps on top of OCS makes it computationally or  
230 mathematically demanding, whereas modifying the genomic relationship matrix directly and easily  
231 modifies how OCS behaves and impacts matings.

### 232 Genomic data

233 The population used in the study included 1009 individuals from the French breeding population of  
234 *Populus nigra* (Pégard *et al.*, 2020). All of them were genotyped with a 12k Infinium array (Faivre-  
235 Rampant *et al.*, 2016) resulting in 5253 usable SNP markers after quality and frequency filtering  
236 (minor allele frequency higher than 0.05). The resulting genotypes were phased, imputed and a  
237 consensus recombination map derived (Pégard *et al.*, 2019) by using FImpute software  
238 (Sargolzaei *et al.*, 2014). The allelic effects were estimated from a genomic multitrait evaluation  
239 using breedR (Muñoz & Sanchez, 2020). In this study, we considered the trunk circumference as a  
240 focal trait.

241 Poplar is a dioecious species. Sex, however, cannot be determined before seven years of age, nor  
242 can it be predicted from the genomic profile yet. For the prospectations in the study, and to overcome  
243 the missing sex of unsexed candidates, we assumed a monoecious population. However, our  
244 method could be easily extended to dioecious populations by adding one simple constraint :  $d^Tc =$   
245 0.5, where  $d$  is a design vector indicating the female/male individuals.

246 Due to the arbitrary sampling of poplar individuals required for breeding purposes, the dataset  
247 used here was strongly structured (Figure S2). In order to check for possible effects of the  
248 structure, in addition to the original dataset, we considered another dataset in which we shuffled

249 the alleles at each locus so that the allele frequencies remained unchanged, while linkage  
250 disequilibrium could be removed.

## 251 Simulation pipeline

252 We considered different simulation scenarios, assuming different values of  $\alpha$ ,  $\beta$  and  $\gamma$ . We  
253 simulated multi-generation breeding schemes of a constant population size  $N$  at each generation,  
254 and the parameters ( $\alpha$ ,  $\beta$  and  $\gamma$ ) remained constant across generations within a given scenario. No  
255 introgression of external genetic material was considered here. As mentioned above, we estimated  
256 the allelic effects from the genotype data with a real phenotype (trunk circumference). The resulting  
257 allelic effects were considered “true” and constant across generations, and used to obtain the True  
258 Breeding Value (TBV) of the newly simulated candidates.

259

260 When simulating multi-generation breeding programs, the question arises as to how genomic  
261 estimated breeding values (GEBVs) should be assessed at each new virtual generation. Due to the  
262 strong demand for computing resources, we mainly considered the case of heritability  $h^2 = 1$ , that  
263 is GEBVs equal to TBVs. However, we considered a smaller set of simulations for the case of  $h^2 =$   
264  $0.66$ , with only  $\alpha$  varying ( $\beta$  and  $\gamma$  fixed to 0). In this case, the newly generated phenotypes  
265 underwent a normally distributed perturbation of mean 0 and variance  $(1 - h^2)\sigma_g^2$ , where  $\sigma_g^2$  was  
266 the TBV variance. At each generation, as was done in Jannink (2010) and De Beukelaer *et al.*  
267 (2017), GEBV was assessed with a ridge regression model (Searle 2006), without including all  
268 previous generations in the genomic evaluation (which would have been done in a real evaluation).  
269 The precision therefore became gradually smaller over generations.

270

271 OCS was then applied at each generation on the simulated GEBVs, and the resulting contributions  
272 were converted into a random mating plan that fits the OCS solution. Finally, with the mating plan,  
273 we simulated the next generation with an ad hoc program (written in C++17 and available on  
274 github at <https://github.com/mathieutiret/meiosis.git>).

275

276 Every simulated replicate proceeded for 20 (non-overlapping) generations, and was devised  
277 without mutation. The simulation followed a grid of parameters:  $\alpha$  ranged from 0.1 to 0.9 (with steps  
278 of 0.1),  $\beta$  ranged from  $-1$  to  $1$  (with steps of 0.5), and  $\gamma$  ranged from  $-1$  to  $1$  (with steps of 0.5).  
279 Each parametric setting was simulated 100 times. In order to compare the results from different  $\beta$   
280 and  $\gamma$ , we also computed for each simulation the “true” coancestry, which is the coancestry the  
281 population would have if  $\beta$  and  $\gamma$  were equal to 0.

## 282 Statistical analyses

283 Finally, in order to determine the relative importance of the factors  $\alpha$ ,  $\beta$  and  $\gamma$  on the genetic gain  
284 and coancestry (through an analysis of variance) at a given generation, we considered the  
285 following statistical model:

286

$$287 Y \sim \alpha + \beta + \gamma + \alpha^2 + e,$$

288

289 where  $Y$  is the output variable (either genetic gain or true coancestry),  $\alpha$ ,  $\beta$  and  $\gamma$  the simulation  
290 parameters treated as fixed effects,  $\alpha^2$  the squared parameter of  $\alpha$ , and  $e$  the residual fitted to a  
291 normal distribution. We consider here a polynomial regression (quadratic term  $\alpha^2$ ) as there could  
292 be some symmetrical boundary effects of  $\alpha$  upon  $Y$ . We will hereafter refer to this as model (1). In  
293 some cases however, we focused on a given value of  $\alpha$ , in which case we considered the following  
294 model:

295

$$296 Y \sim \beta + \gamma + e,$$

297

298 with equal notations and assumptions as model (1). We will hereafter refer to this as model (2).  
299 These two models were analyzed using R - 3.6.3 (functions *lm* and *anova* from the base R

300 package *stats*). We considered a Type I analysis of variance for polynomial regression, and the  
 301 statistical significance of each factor was assessed with a Fisher's *F*-test.

302

## 303 Results

### 304 Overall evolution of genetic gain and coancestry met common expectations

305 In this section, we only studied the effect of  $\alpha$ , considering  $\beta$  and  $\gamma$  both equal to 0, corresponding  
 306 then to the classical formulation of OCS. As expected, the average value of both genetic gain and  
 307 coancestry increased over time (Table 2). Moreover, and also as expected, the increases in genetic  
 308 gain and coancestry were more pronounced for lower  $\alpha$ . Different heritabilities led to a different  
 309 average genetic gain after twenty generations:  $161.8 \pm 4.2$  when  $h^2 = 1$ , and  $148.7 \pm 4.9$  when  $h^2 =$   
 310  $0.66$ . When looking at the ratios between changes in coancestry and changes in genetic gain over  
 311 the studied period (in other words a measure of the cost of diversity per unit of genetic gain), it is  
 312 clear that increases in  $\alpha$  reduced the impact of genetic gain on diversity accordingly. In the extreme  
 313 with the highest  $\alpha$ , producing genetic gain has no perceptible cost in coancestry. Such efficiency  
 314 was most evident when raising the heritability levels. This result is again expected, corroborating  
 315 that selection is more efficient when the heritability of the trait is higher.

316

317 **Table 2.** Average values, standard deviations and coefficients of variation (CV, in percentages) of  
 318 genetic gain or coancestry depending on the heritability, at generation 1 and 20, with  $\beta = \gamma = 0$ .

319

|                |       | genetic gain |        |           |        | coancestry   |        |           |        |
|----------------|-------|--------------|--------|-----------|--------|--------------|--------|-----------|--------|
|                |       | $h^2 = 0.66$ |        | $h^2 = 1$ |        | $h^2 = 0.66$ |        | $h^2 = 1$ |        |
|                |       | t = 1        | t = 20 | t = 1     | t = 20 | t = 1        | t = 20 | t = 1     | t = 20 |
| $\alpha = 0.1$ | $\mu$ | 42.1         | 148.7  | 44.6      | 161.8  | 0.3          | 1.0    | 0.3       | 1.0    |

|                                  |                            |      |       |      |       |        |       |        |       |
|----------------------------------|----------------------------|------|-------|------|-------|--------|-------|--------|-------|
|                                  |                            |      |       |      |       |        |       |        |       |
|                                  | <b><math>\sigma</math></b> | 1.2  | 4.9   | 0.1  | 4.2   | 0.03   | 0.01  | 0.0001 | 0.01  |
|                                  | <b>CV</b>                  | 3.0  | 3.3   | 0.2  | 2.6   | 8.5    | 1.0   | 0.1    | 0.9   |
| <b><math>\alpha = 0.9</math></b> | <b><math>\mu</math></b>    | 34.2 | 103.0 | 35.3 | 118.3 | 0.2    | 0.2   | 0.2    | 0.2   |
|                                  | <b><math>\sigma</math></b> | 0.3  | 1.8   | 0.11 | 2.1   | 0.0004 | 0.002 | 0.0001 | 0.003 |
|                                  | <b>CV</b>                  | 1.0  | 1.8   | 0.32 | 1.75  | 0.2    | 1.36  | 0.07   | 1.70  |

320

322

323 There is, however, no expectation regarding the genetic gain and coancestry variances, since OCS  
 324 formulates its objective function and constraints in terms of expected values, not of variances.  
 325 Nevertheless, simulations showed a consistent increase in the variance and coefficient of variation  
 326 (CV) for genetic gain over time (Table 2). As for coancestry, the variances also increased, except  
 327 for the combination  $h^2 = 0.66$  and  $\alpha = 0.1$ , where both the variance and CV decreased. The  
 328 increases in variance for both genetic gain and coancestry were less pronounced for  $\alpha = 0.9$  than  
 329 for  $\alpha = 0.1$  (Table 2), suggesting that the risk associated with a targeted genetic gain was better  
 330 controlled when restricting coancestry. Finally, in the long run, variances and CV were similar  
 331 between different values of heritabilities, suggesting that even with a perfect heritability, the  
 332 variance eventually increases. It can be noted, however, that the variances and CV remained  
 333 overall low (CV < 10%).

334 Trading genetic gain for diversity decreases short-term genetic gain, but increases long-  
335 term gain

336 In this section, we studied the evolution pattern of genetic gain and coancestry in the case of  $\beta$  and  
337  $\gamma$  equal to 0, on the shuffled dataset, as it is the case for “classic” OCS.

338 **Short-term vs long-term genetic gain.** Different long-term horizons of genetic gain were reached  
339 depending on the value of  $\alpha$  when  $h^2 = 1$  (Figure 1). In the relatively short-term, less than 6  
340 generations, the achieved genetic gain decreased with increasing  $\alpha$ . Eventually, in the longer term,  
341 the optimum  $\alpha$  for genetic gain shifted from lower values to intermediate and then higher values of  
342  $\alpha$ . At the highest horizon, the lower the value of  $\alpha$ , the lower the plateau of genetic gain, or the  
343 sooner the bend marking the start of the plateau. Such a plateau has already been described in the  
344 literature for OCS (Jannink, 2010; De Beukelaer *et al.*, 2017), indicating a trade-off between the  
345 short and long-term horizons when setting the importance of gain versus diversity. When  $h^2 = 0.66$   
346 (not shown), the increase in genetic gain over time was slower than when  $h^2 = 1$ , with no view of  
347 the bend preceding the plateau: as stated above, the increase in genetic gain is slower for smaller  
348 heritabilities.

349

350 **Figure 1.** Evolution over time of coancestry (left panel) or genetic gain (right panel), for different  
351 values of  $\alpha$  (dark blue for  $\alpha = 0.1$ , light blue for  $\alpha = 0.9$ ), with  $\beta = \gamma = 0$ , and  $h^2 = 1$ .

352

353 **Short-term vs long-term coancestry.** The parameter  $\alpha$  also had a strong effect on the pattern of  
354 evolution of coancestry when  $h^2 = 1$  (Figure 1). The optimum  $\alpha$  for coancestry (i.e.  $\alpha = 1$ ) did not  
355 change across generations, i.e. the same ranking of  $\alpha$  according to coancestries occurred for all  
356 generations. The most relevant feature, however, is that the change in coancestry between  
357 extreme values of  $\alpha$  was larger than those observed for gain. In the long term (at generation  
358 twenty), coancestry increased by 448% when  $\alpha$  shifted from 0.9 to 0.1 (Table 2). In the same time  
359 horizon and over the same shift of  $\alpha$ , genetic gain had only increased by 37%. Such a difference in

360 scale of response between gain and coancestry is clear even at the first generation of application  
361 of OCS. When observing the Pareto function (Figure S1), depicting the best trade-offs between  
362 gain and coancestry across the range of  $\alpha$ , it is clear that there is potentially a substantial reduction  
363 in coancestry with minimum costs in gain whenever  $\alpha$  is set between zero and intermediate values  
364 ( $\alpha < 0.5$ ). The difference between  $h^2 = 1$  and  $h^2 = 0.66$  was significant for genetic gain (all  $p <$   
365  $0.05/180$ , Student's t-tests with Bonferroni correction for 180 tests), while it was not for coancestry  
366 (only 58 Student's t-tests showed a p-value  $< 0.05/180$ ).

367 The effect of  $\alpha$  as the most explanatory factor after a long run

368 **After one generation of OCS.** Model (1) showed strong adjusted coefficients of determination for  
369 both genetic gain ( $r^2 = 0.86$ ) and coancestry ( $r^2 = 0.95$ ) (Table S2 and S3, respectively), thus  
370 suggesting a strong explanatory power of the parameters  $\alpha$ ,  $\beta$  and  $\gamma$ . Likewise, in the small dataset  
371 with  $h^2 = 0.66$  ( $\beta$  and  $\gamma$  fixed to 0), model (1) showed strong coefficients for both genetic gain ( $r^2 =$   
372  $0.96$ ) and coancestry ( $r^2 = 0.96$ ).

373

374 The proportion of the sum of squares varied across parameters, ranking  $\alpha$  as the most explanatory  
375 factor for both genetic gain (76.8%) and coancestry (78.2%).  $\beta$  had a weak effect on both genetic  
376 gain (4.0%) and coancestry (0.07%), showing that weighting pairs according to their impact on  
377 segregation is not efficient for controlling the population in the very short-term. Comparatively,  
378 effects of  $\gamma$  were small for both genetic gain (1.4%) and coancestry (0.07%). Knowing that  
379 controlling mating only has an effect on a population at generation  $t+2$ ,  $\beta$  and  $\gamma$  were expected to  
380 have small effects, as confirmed by these simulations: their effect is expected to be relevant in the  
381 subsequent generations. Quadratic coefficient of  $\alpha$  did not have a strong sum of squares for  
382 genetic gain (4.0%), but rather large for coancestry (17.1%), making the coefficient  $\alpha$  explain  
383 95.3% of the total variance: in the short-term,  $\alpha$  is the main predictive and explanatory factor.

384



385 **After twenty generations of OCS.** Model (1) still showed strong adjusted coefficients of  
386 determination for both genetic gain ( $r^2 = 0.79$ ) and coancestry ( $r^2 = 0.93$ ). For genetic gain,  
387 quadratic  $\alpha$  was the most explanatory factor, followed by  $\alpha$  causing the joint sum of squares of  $\alpha$  to  
388 be equal to 63% (21% + 42%; Table S2). Likewise, for coancestry, the effect of  $\alpha$  was the most  
389 explanatory factor, with the joint sum of squares equal to 91.5.3% (91.3% + 0.2%; Table S3),  
390 suggesting that the overall population dynamics (genetic gain and coancestry) is mostly  
391 determined by  $\alpha$ . From generation one to twenty, the effect of  $\beta$  increased from 4.0% to 15.9% for  
392 genetic gain, and increased from 0.07% to 1.4% for coancestry: its effect converged towards  
393 intermediate values for genetic gain and remained low for coancestry, showing that He x Ho pairs  
394 had a lesser but still not negligible role in the population dynamics. The effect of  $\gamma$  decreased to an  
395 even smaller value for both genetic gain (0.007%) and coancestry (0.01%), corroborating the fact  
396 that He x He pairs are negligible for the population dynamics. Overall, in the long run,  $\alpha$  was the  
397 predominant effect, with  $\beta$  coming second, and a negligible effect for  $\gamma$ . As for the small dataset  
398 with  $h^2 = 0.66$ , model (1) showed strong adjusted coefficients of determination for both the genetic  
399 gain ( $r^2_{\text{adj}} = 0.99$ ) and coancestry ( $r^2_{\text{adj}} > 0.99$ ), showing that even with a weaker heritability,  $\alpha$  was  
400 still a strong explanatory factor of the long-term population dynamics. Similar results have been  
401 shown in previous studies (see Clark *et al.*, 2013).

#### 402 Compensatory matings as the most efficient mating strategy

403 In this section, we finally studied the influence of all the parameters,  $\alpha$ ,  $\beta$  and  $\gamma$ , on a multi-  
404 generation OCS, on the shuffled dataset, with a single value of heritability ( $h^2 = 1$ ). Each parametric  
405 combination was kept constant across generations for a given set of parameters. It is important to  
406 remember that  $\beta$  weights the importance of He x Ho pairs in  $G^*$  (higher  $\beta$ , lower importance), while  
407  $\gamma$  weights the importance of He x He pairs (higher  $\gamma$ , lower importance).

408

409 **Negligibility of He x He pairs.** Model (2) showed a much stronger effect of  $\beta$  on both genetic gain  
410 and coancestry than  $\gamma$  (Figures S3 and S5). For high values of  $\alpha$  ( $\alpha > 0.4$ ), the proportion of genetic  
411 gain variance explained was much higher for  $\beta$  (> 30%) than for  $\gamma$  (< 5%), again suggesting a

412 stronger effect of He x Ho pairs on genetic gain than He x He pairs (Figure S4). Indeed, the  
413 estimated values of  $\beta$  were increasingly negative as  $\alpha$  increased, corroborating that favoring He x  
414 Ho pairs (negative  $\beta$ ) improves genetic gain. On the other hand, the estimates of  $\gamma$  remained close  
415 to 0, showing its negligibility. Likewise, for coancestry,  $\beta$  had a higher explanatory power ( $> 70\%$ )  
416 than  $\gamma$  ( $< 10\%$ , Figure S6). The effects of  $\beta$  increased as  $\alpha$  increased, showing that favoring He x  
417 Ho pairs ( $\beta < 0$ ) would enable to maintain a lower coancestry.

418

419 **Advantage of semi compensatory mating.** After twenty generations, the performances in terms  
420 of genetic gain or (true) coancestry were different according to  $\alpha$  and  $\beta$  (Figure 2). For low values  
421 of  $\alpha$  ( $< 0.5$ , i.e. promoting the maximization of genetic gain over the minimization of coancestry),  
422 both genetic gain and coancestry were strongly influenced by  $\alpha$ , but only negligibly by  $\beta$ ,  
423 suggesting that when genetic gain is the main driver of OCS, information about preferential pairs  
424 does not allow further improvement in performance in the breeding system. However, for larger  $\alpha$   
425 ( $> 0.5$ , i.e. promoting the minimization of coancestry over the maximization of gain), favoring He x  
426 Ho pairs ( $\beta < 0$ ) or no mating ( $\beta = 0$ ) resulted in best performances, i.e. a higher genetic gain for a  
427 given value of (true) coancestry. More precisely, the apparent Pareto function is upwardly bounded  
428 by  $\beta = 0$  and  $\beta = -0.5$ , and this is even more clear when  $\alpha$  tends towards its maximum value,  
429 suggesting that optimality is between the “no mating” strategy and the semi-compensatory mating.  
430 It can be noted that full compensatory mating ( $\beta = -1$ ) is suboptimal, detached from the Pareto limit,  
431 compared to the previous two strategies. The results thus suggest that  $\beta$  has a significant role  
432 when coancestry is the main driver of OCS. In this case, promoting the He x Ho pairs could be as  
433 favorable as none, both situations being on the Pareto curve.

434

435 **Figure 2.** Coancestry versus genetic gain, at generation 20, for different values of  $\alpha$  (dark blue for  
436  $\alpha = 0.1$ , light blue for  $\alpha = 0.9$ ) and  $\beta$  (circle for  $\beta = -1$ ; triangle for  $\beta = -0.5$ ; square for  $\beta = 0$ ; cross  
437 for  $\beta = 0.5$ ; and square crossed for  $\beta = 1$ ), with  $\gamma = 0$  and  $h^2 = 1$ . Coancestry on the x-axis is the  
438 true coancestry, meaning that it is computed assuming that  $\beta = \gamma = 0$ .

439

440 However, considering an alternative way of assessing the potential of a breeding program by  
441 measuring the GEBV of the population from favorable alleles that are not fixed yet, the two  
442 alternatives with a “no mating” strategy ( $\beta = 0$ ) and the semi-compensatory mating ( $\beta = -0.5$ ) can  
443 be ultimately distinguished (Figure 3). For  $\alpha < 0.5$ ,  $\beta = 0$  is the best strategy with a slightly higher  
444 genetic potential over counterparts. As  $\alpha$  increases beyond 0.5, however, the average GEBV gets  
445 progressively higher for  $\beta = -0.5$ , meaning that, while the two alternatives are equally on the Pareto  
446 curve, semi-compensatory mating keeps a higher potential of genetic gain, potentially ensuring a  
447 higher selection plateau.

448

449 **Figure 3.** Boxplots of GEBV, at generation 20, for different values of  $\alpha$  and  $\beta$ , when only  
450 considering alleles that are not yet fixed, with  $\gamma = 0$  and  $h^2 = 1$ .

## 451 Discussion

### 452 Long-term strategy in breeding programs

453 In a multi-generation breeding program, being able to select favorable alleles with little losses due  
454 would be the most desirable feature. Drift often occurs through unwanted genetic hitchhiking when  
455 favorable and unfavorable alleles are *trapped* by limited sampling in continuous segments in  
456 linkage disequilibrium. There is therefore always a risk of loss as recombination might not be able  
457 to cope with the pace of selection and sampling generating the unfavorable linkage. One way to  
458 render recombination more efficient without slowing down the selection process would be to favor  
459 the pairing of candidates with a high potential for segregation in the offspring. It can be done more  
460 or less explicitly. One of the classical approaches, as shown in previous works (Jannink, 2010; De  
461 Beukelaer *et al.*, 2017; Allier *et al.*, 2019), consists in accounting for diversity through the tradeoff  
462 parameter  $\alpha$ , where diversity among candidates is modeled through relatedness or coancestry.  
463 This weighted approach, or the constrained formulation, can enhance the selection plateau, but

464 often at the cost of slowing down the rate of progress. When such a perspective is applied to late  
465 maturing perennials, the cost in time for slow progress becomes a heavy drawback.

466

467 Another alternative to accelerate breeding without the drawback of drift is to minimize the  
468 uncertainties concerning the consequences of selection decisions, so that decisions can be based  
469 on sounding predictions of the impact of selection on future generations. A way of doing this is to  
470 account for the mating regime between candidates, which is typically set at random for OCS.  
471 Explicit consideration of mating has proven to be a successful alternative (see Akdemir & Sánchez,  
472 2016), although often computationally demanding and not deterministically solvable, except for  
473 regular, very specific schemes based on a “round-robin” handling of reproductive roles and genetic  
474 contributions (Sánchez *et al.*, 2003). We tried a different, simpler approach here, by tweaking the  
475 OCS to implicitly reflect the choice of pairs: we obtained better long-term performances and the  
476 problem is deterministically solvable. We have shown that modifying the genomic relationship  
477 matrix could be an easy solution with a satisfying compromise between high performance and  
478 doability.

479

480 When focusing on genetic gain (low  $\alpha$ ), the best modification of the genomic relationship matrix  
481 was undoubtedly none ( $\beta = \gamma = 0$ ), meaning that no mating plan can counterbalance the effect of  
482 drift. However, when considering higher  $\alpha$ , the best modification was when we favored  $H_e \times H_o$   
483 pairs (lower  $\beta$ ). Such pairs can be seen as a kind of compensatory mating, and they have already  
484 been described as performing alternatives when it comes to minimize hitchhiking effects in  
485 selected populations (Caballero *et al.*, 1996; Sánchez *et al.*, 2006). Our work suggests that  
486 benefits of compensatory mating come from maintaining a high selective potential among not yet  
487 fixed alleles (Figure 3).

488 Mating ( $\beta$  and  $\gamma$ ) as a nested effect of diversity ( $\alpha$ )

489 In the OCS formulation,  $\alpha$  remains the most important factor determining gain and diversity in the  
490 population dynamics over generations. In its classical formulation, i.e.  $\beta$  and  $\gamma$  equal to zero, OCS  
491 has become one of the most efficient strategies with a combination of genetic gain and coancestry  
492 making the very edge of the Pareto optimum, as expected. When allowing for different weightings  
493 for the breeding pairs through the extra parameters  $\beta$  and  $\gamma$ , it was clear that pair choice had also a  
494 non-negligible role that increased in importance over generations (Tables S2 and S3), both for  
495 genetic gain and coancestry. Mating, seen through the implicit formulation derived here, was then  
496 the second most important factor in the optimal outputs. We could safely conjecture that through  
497 an explicit formulation such importance could be further enhanced, although it would probably  
498 remain second to the effect of  $\alpha$ , as already pinpointed by Toro & Varona (2010).

499

500 For a given  $\alpha$ , and notably for the highest values,  $\beta$  modulated the genetic gain over generations in  
501 a direct and conspicuous manner (Figure 2): promoting He x Ho pairs (i.e.,  $\beta < 0$ ) increased  
502 genetic gain, while penalizing He x Ho pairs ( $\beta > 0$ ) decreased genetic gain. Increasing genetic  
503 gain usually means: (i) a lower genetic (and genic) variance after selection, (ii) a higher level of  
504 fixation of favorable alleles, which constitutes the matter making up genetic gain, and (iii) a higher  
505 level of negative linkage disequilibrium covariance due to the Bulmer effect (Bulmer, 1974).

506 Therefore, the extra gain obtained from  $\beta < 0$  could come from using more efficiently the genic  
507 variance, resulting in more depletion compared to that of higher  $\beta$  levels (Figure S7), and thus  
508 converting this available variation into favorable allele fixation, or likewise unfavorable allele  
509 elimination. Compared to  $\beta = 0$ ,  $\beta = -0.5$  was always on the side of the Pareto curve with higher  
510 coancestry (and gain). Promoting He x Ho pairs, which could theoretically boost segregation in  
511 descendants more than any other combination, could be the source of the extra genetic variation  
512 that is made available favorably for selection under  $\beta < 0$ . On the other hand, promoting  
513 segregation across loci could be a source of linkage disequilibrium generating negative covariation

514 of effects, as the chances of uniting alleles of opposing effects across neighboring loci could be  
515 increased and further boosted by selection. Such a tendency is clearly shown in Figure S8.

516 When looking at the opposite extreme, when  $\beta > 0$  and notably at  $\beta = 1$ , genetic gain is lowest  
517 while the levels of genotypic covariance due to linkage disequilibrium are soon recovered from  
518 initial Bulmer effect depression and reached the highest values (Figure S8). We can confidently  
519 assume that selection was weak with  $\beta = 1$ , leaving available variance unused. A substantial part of  
520 the genotypic variance is inflated due to positive linkage disequilibrium, which means that the  
521 underlying genic variance is not that high. This is confirmed partially by Figure S7 on genic  
522 variance, notably for the extreme case of  $\beta = 1$ .

523 If  $H_e \times H_o$  are penalized with  $\beta = 1$ , we could suppose that other pairs like  $H_o \times H_o$  get promoted  
524 instead, and the fact that positive linkage disequilibrium is present would mean that genotypes  
525 concentrate either favorable homozygotes or unfavorable homozygotes. This situation, or when the  
526 genotypic variance is higher than the genic variance, is potentially favorable for selection to  
527 discriminate efficiently between favorable and unfavorable alleles, the extreme case being that of  
528 sublines or lineages with selection proceeding between them. This potentiality, however, did not  
529 materialize in better gains for  $\beta = 1$ , suggesting that there is a cause of inefficiency preventing  
530 selection from using that advantage. One such cause could be the fact of having unfavorable  
531 alleles segregating in the population with a risk of fixation, dragging gain downwards. The analysis  
532 on effect of selection and drift – that is, the accumulation of favorable allele and loss of unfavorable  
533 allele, or respectively the accumulation of unfavorable allele and loss of favorable alleles (Figure  
534 S9) – was not conclusive. They are surprisingly equivalent, almost symmetrical, suggesting that  
535 selection has no advantages over drift, and whenever favorable alleles get fixed, unfavorable  
536 counterparts get fixed on the way.

### 537 Variance in OCS equation

538 The main challenge of OCS lies in the management of stochasticity: the objective function, as  
539 stated above, is formulated with expected values, and not with variances, thus neglecting the

540 variability caused by the uncertainties of random mating and the Mendelian sampling. This causes  
541 stochasticity around predicted Pareto optima, even more pronounced when considering a low  
542 heritability. In that latter case, selection precision is expected to be low, giving higher chances to  
543 drift to lower the selection plateau.

544

545 Introducing variability in the parameter could also be desirable in the case of multi-generation  
546 breeding, such as considering different values of  $\alpha$ ,  $\beta$  and  $\gamma$  for each generation, depending on the  
547 current state of the population. For instance, considering a high value of  $\alpha$  (high diversity) could be  
548 important at the very short term to prevent losses of favorable alleles in low frequency, but once  
549 the Bulmer effect is absorbed by recombination, it could be safely to switch to a more aggressive  
550 strategy such as with lower values of  $\alpha$ , and semi compensatory mating ( $\beta = -0.5$ ). Preliminary  
551 works showed indeed that a decreasing  $\alpha$  along the generations brings better long-term  
552 performances. Differential selection over generation is therefore a field worth investigating, and  
553 warrants further studies.

554

555 One potential source of uncertainty in our study could be the limitation of the evaluation population  
556 to the current and the previous parental generation in order to simplify and speed up the  
557 simulations. To some extent, such a constraint could have favored the scenarios with higher  $\alpha$ ,  
558 which were less affected by evaluation errors (data not shown). Indeed, they provided a wider  
559 diversity on which to evaluate more precisely the allelic effects. However, it would not be expected  
560 that such an effect distorts the comparison across neighboring values of  $\beta$ .

## 561 Conclusions

562 In this paper, we have shown an intuitive way to extend the classic OCS by (1) reformulating the  
563 concept with the tradeoff  $\alpha$  (and providing a deterministically solvable algorithm) and (2) accounting  
564 implicitly for mating by extending the formulation of the genomic relationship matrix. As shown  
565 above, in multi-generation breeding programs it is important to account for diversity to reach a

566 higher selection plateau, even though the speed at which it is reached can be slow. Accounting for  
567 mating, even implicitly as proposed here by favoring some kind of semi compensatory mating,  
568 could minimize the speed problem, by “accelerating” the breeding while maintaining a high level of  
569 diversity and selective potential for future generations. Finally, this study could open up new  
570 possibilities to make OCS a more adaptive tool to handle the dynamics of genetic diversity in  
571 selected populations.

## 572 Funding

573 This study was funded by the following sources: the INRA SELGEN funding program (project  
574 BreedToLast) providing sequencing, genotyping data and PhD grant for MP; and from the  
575 European Union’s Horizon 2020 research and innovation program under grant agreement No  
576 676876 (GenTree) for basic functioning and postdoc grant for MT and MP.

## 577 Acknowledgments

578 The authors acknowledge the GIS peuplier for access to data.

579

## 580 Author Contribution

581 TM and SL conceptualized the analyses. PM worked on the data curation. SL supervised the work,  
582 administrated the project and acquired the funding and resources. TM developed the software and  
583 analyzed the data. TM, PM and SL wrote the manuscript.

584

585



## 586 References

587

588 Akdemir D, Sánchez JI. Efficient breeding by genomic mating. *Frontiers in genetics*. 2016; 7: 210.

589

590 Akdemir D, Beavis W, Fritsche-Neto R, Singh AK, Isidro-Sánchez J. Multi-objective optimized  
591 genomic breeding strategies for sustainable food improvement. *Heredity*. 2019; 122: 672-683.

592

593 Allier A, Lehermeier C, Charcosset A, Moreau L, Teyssèdre S. Improving short-and long-term  
594 genetic gain by accounting for within-family variance in optimal cross-selection. *Frontiers in*  
595 *genetics*. 2019; 10: 1006.

596

597 Boyd S, Boyd SP, Vandenberghe, L. *Convex optimization*. Cambridge university press; 2004.

598

599 Brisbane JR, Gibson JP. Balancing selection response and rate of inbreeding by including genetic  
600 relationships in selection decisions. *Theoretical and Applied Genetics*. 1995; 91: 421-431.

601

602 Bulmer M. The effect of selection on genetic variability. *The American Naturalist*. 1971; 105: 201-  
603 211.

604

605 Caballero A, Santiago E, Toro MA. Systems of mating to reduce inbreeding in selected populations.  
606 *Animal science*. 1996; 62: 431-442.

607

608 Caballero A, Toro MA. Interrelations between effective population size and other pedigree tools for  
609 the management of conserved populations. *Genetical Research*. 2000; 75: 331-43.

610

611 Clark SA, Kinghorn BP, Hickey JM, Van der Werf JH. The effect of genomic information on optimal  
612 contribution selection in livestock breeding programs. *Genetics selection evolution*. 2013; 45: 1-8.

613

614 De Beukelaer H, Badke Y, Fack V, De Meyer G. Moving beyond managing realized genomic  
615 relationship in long-term genomic selection. *Genetics*. 2017; 206: 1127-1138.

616

617 Faivre-Rampant P, Zaina G, Jorge V, Giacomello S, Segura V, et al. New resources for genetic  
618 studies in *Populus nigra*: genome-wide SNP discovery and development of a 12k Infinium array.  
619 *Molecular Ecology Resources*. 2016; 16: 1023–1036.

620

621 Gao X, Martin ER. Using allele sharing distance for detecting human population stratification.  
622 *Human heredity*. 2009; 68: 182-191.

623

624 Garcia-Cortes LA, Legarra A, Chevalet C, Toro MA. Variance and Covariance of Actual  
625 Relationships between Relatives at One Locus. *PLOS ONE*. 2013; 8: e57003.

626

627 Gebregiwergis GT, Sørensen AC, Henryon M, Meuwissen T. Controlling Coancestry and Thereby  
628 Future Inbreeding by Optimum-Contribution Selection Using Alternative Genomic-Relationship  
629 Matrices. *Frontiers in Genetics*. 2020; 11: 345.

630

631 Goddard M. Genomic selection: prediction of accuracy and maximisation of long term response.  
632 *Genetica*. 2009; 136: 245-257.

633

634 Hayes BJ, Bowman PJ, Chamberlain AJ, Goddard ME. Invited review: Genomic selection in dairy  
635 cattle: Progress and challenges. *Journal of dairy science*. 2009; 92: 433-443.

636

637 Jannink JL. Dynamics of long-term genomic selection. *Genetics Selection Evolution*. 2010; 42: 1-  
638 11.

639

640 Li Y, Kadarmideen H, Dekkers J. Selection on multiple qtl with control of gene diversity and  
641 inbreeding for long-term benefit. *J. Anim. Breed. Genet*. 2008; 125: 320–329.

642

643 Meuwissen THE. Maximizing the response of selection with a predefined rate of inbreeding.  
644 *Journal of animal science*. 1997; 75: 934-940.

645

646 Meuwissen THE, Hayes BJ, Goddard ME. Prediction of total genetic value using genome-wide  
647 dense marker maps. *Genetics*. 2001; 157: 1819-1829.

648

649 Meuwissen THE, Sonesson AK, Gebregiwerigis G, Woolliams JA. Management of Genetic  
650 Diversity in the Era of Genomics. *Front. Genet*. 2020; 11: 880.

651

652 Muñoz F, Sánchez L. breedR: Statistical Methods for Forest Genetic Resources Analysts. R  
653 package version 0.12-5. 2020; <https://github.com/famuvie/breedR>

654

655 Pégard M, Rogier O, Bérard A, Faivre-Rampant P, Paslier MCL, et al. Sequence imputation from  
656 low density single nucleotide polymorphism panel in a black poplar breeding population. *BMC*  
657 *Genomics*. 2019; 20: 302.

658

659 Pégard M, Segura V, Muñoz F, Bastien C, Jorge V, Sanchez L. Favorable conditions for genomic  
660 evaluation to outperform classical pedigree evaluation highlighted by a proof-of-concept study in  
661 poplar. *Frontiers in plant science*. 2020; 11.

662

663 R Core Team. R: A language and environment for statistical computing. R Foundation for Statistical  
664 Computing, Vienna, Austria. 2020; URL <https://www.R-project.org/>.

665

666 Rutkoski J, Singh RP, Huerta-Espino J, Bhavani S, Poland J, Jannink JL, Sorrells ME. Efficient use  
667 of historical data for genomic selection: a case study of stem rust resistance in wheat. *The Plant*  
668 *Genome*. 2015; 8: plantgenome2014-09.

669

670 Sargolzaei M, Chesnais JP, Schenkel FS. A new approach for efficient genotype imputation using  
671 information from relatives. *BMC GENOMICS*. 2014; 15.

672

673 Sánchez L, Bijma P, Woolliams JA. Minimizing inbreeding by managing genetic contributions  
674 across generations. *Genetics*. 2003; 164.

675

676 Sánchez L, Caballero A, Santiago E. Palliating the impact of fixation of a major gene on the genetic  
677 variation of artificially selected polygenes. *Genetical Research*. 2006; 88.

678

679 Santiago E, Caballero A. Effective size of populations under selection. *Genetics*. 1995; 139: 1013-  
680 1030.

681

682 Sonesson AK, Meuwissen THE. Mating schemes for optimum contribution selection with  
683 constrained rates of inbreeding. *Genetics Selection Evolution*. 2000; 32: 231-248.

684

685 Toro MA, Varona L. A note on mate allocation for dominance handling in genomic selection.  
686 *Genetics Selection Evolution*. 2010; 42: 33.

687

688 VanRaden PM. Efficient methods to compute genomic predictions. *Journal of dairy science*. 2008;  
689 91: 4414-4423.

690

691 Varona L, Misztal I. Prediction of parental dominance combinations for planned matings,  
692 methodology, and simulation results. *Journal of dairy science*. 1999; 82: 2186-2191.

693

694 Vitezica ZG, Varona L, Legarra A. On the additive and dominant variance and covariance of  
695 individuals within the genomic selection scope. *Genetics*. 2013; 195: 1223-1230.

696

697 Woolliams JA, Mäntysaari EA. Genetic contributions of Finnish Ayrshire bulls over four  
698 generations. *Animal Science*. 1995; 61: 177–187.

699

700 Woolliams JA, Pong-Wong R, Villanueva, B. Strategic optimisation of short-and long-term gain and  
701 inbreeding in MAS and non-MAS schemes. In *Proceedings of the 7th World Congress on Genetics  
702 Applied to Livestock Production (Vol. 33, pp. 155-162)*. 2002; Montpellier.

703

704 Yoshida GM, Yáñez JM, de Queiroz SA, Carvalheiro R. Mate selection provides similar genetic  
705 progress and average inbreeding than optimum contribution selection in the long-term.  
706 *Aquaculture*. 2020; 526: 735376.

707

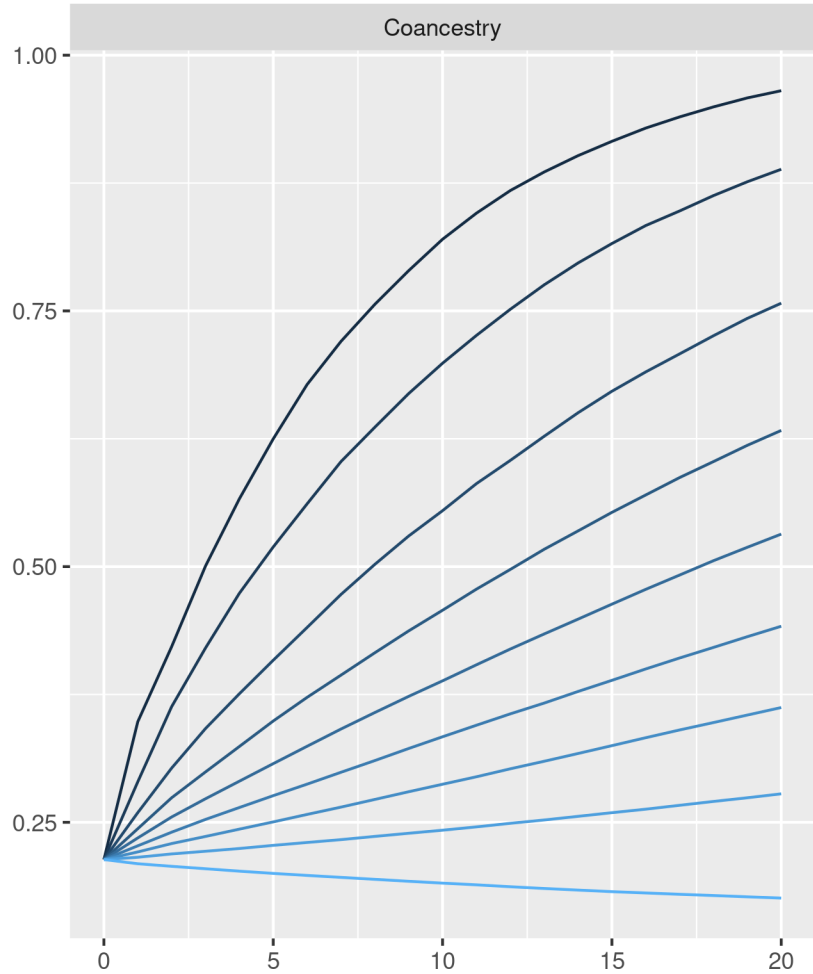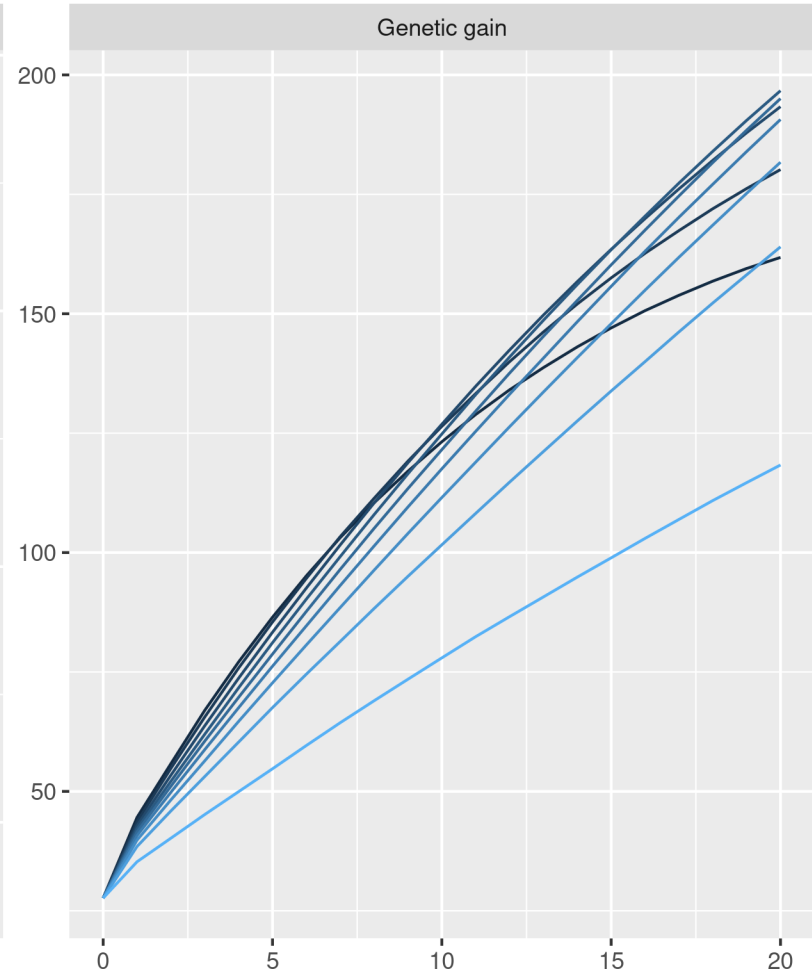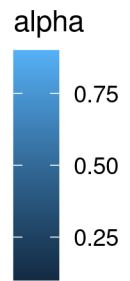

Generations



GEBV of not fixed alleles

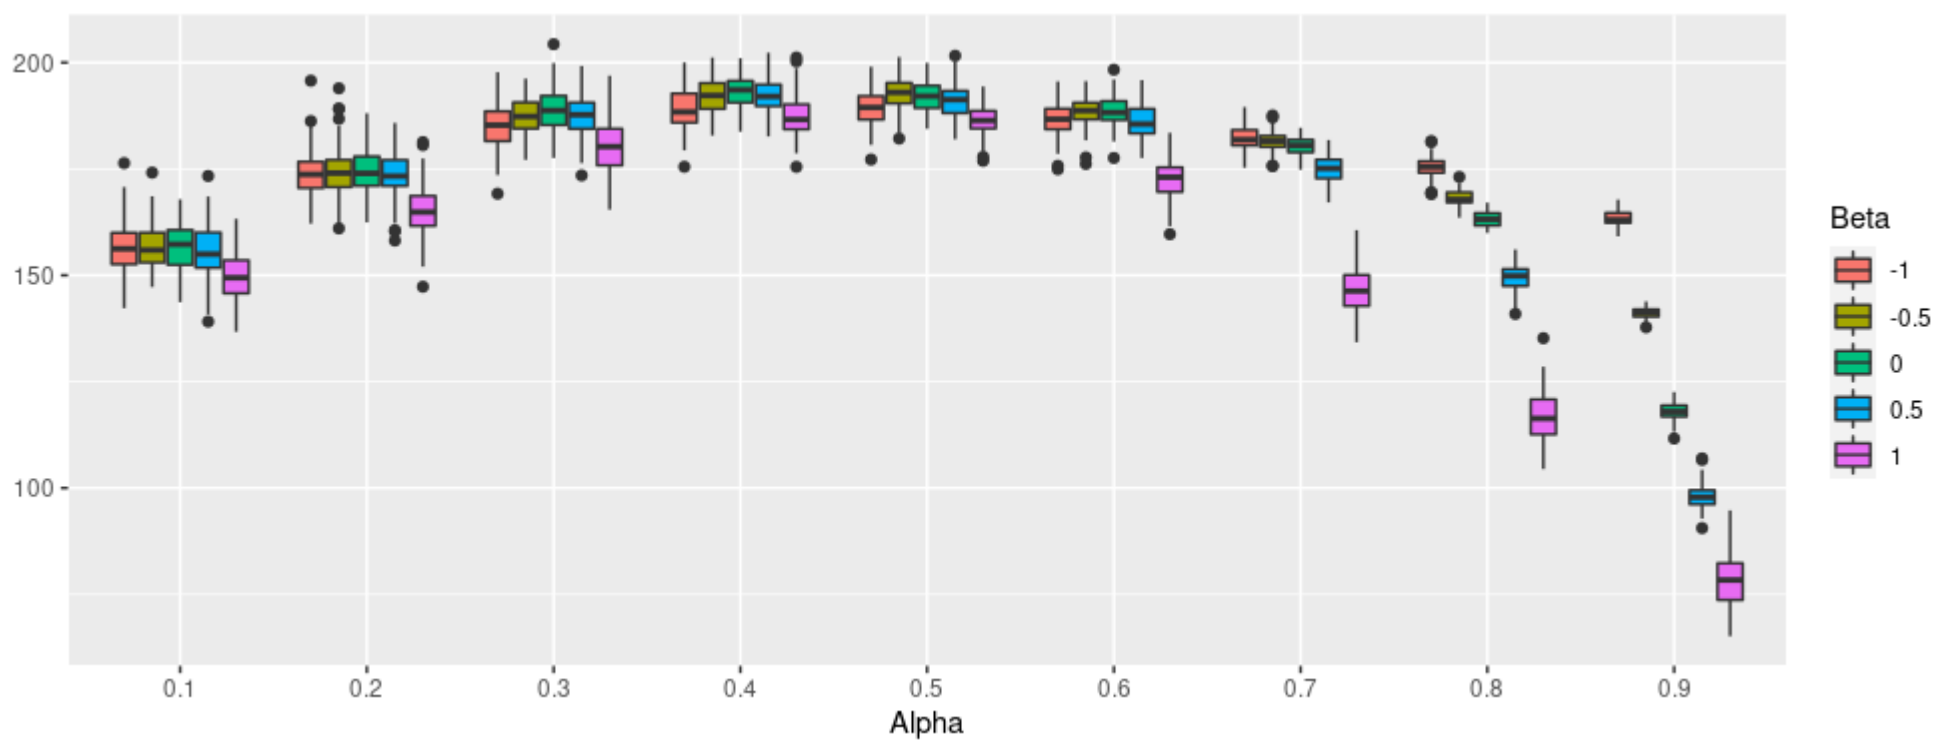

Source: https://www.biorxiv.org/content/10.1101/2021.02.15.431233v2.full.pdf
